# Supplementary material for: Krüppel-Like Factor 12 Promotes Colorectal Cancer Growth through Early Growth Response Protein 1
Source: PubMed Central journal article supplement (PMC4956169; doi:10.1371/journal.pone.0159899), 2016-07-21

# S1 Fig

## A

### HT-29 cells

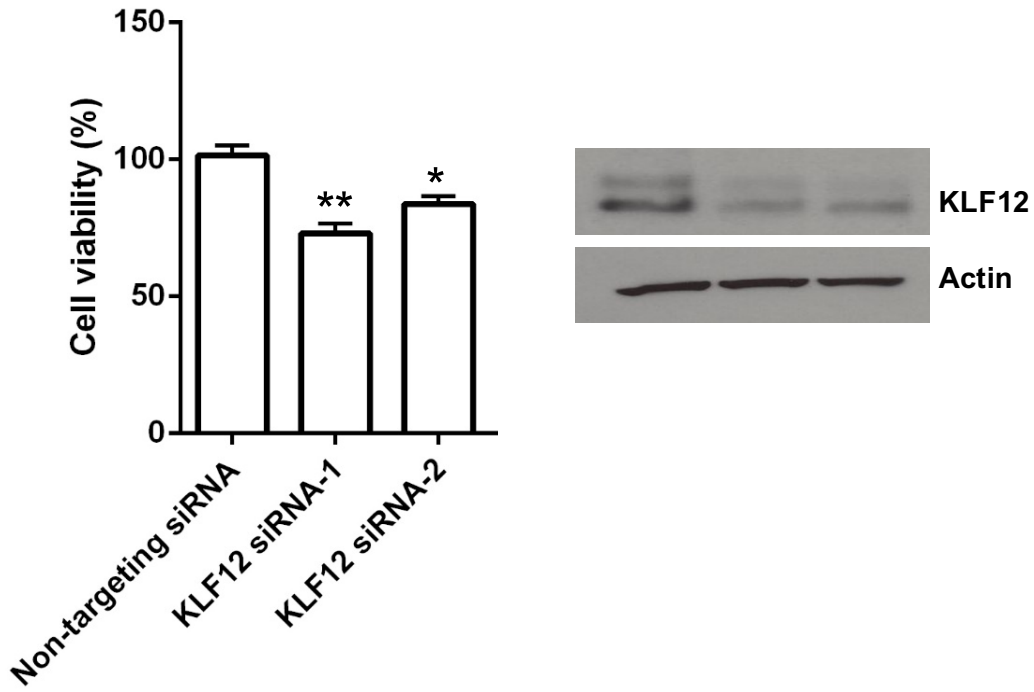

## B

### HCT-116 cells

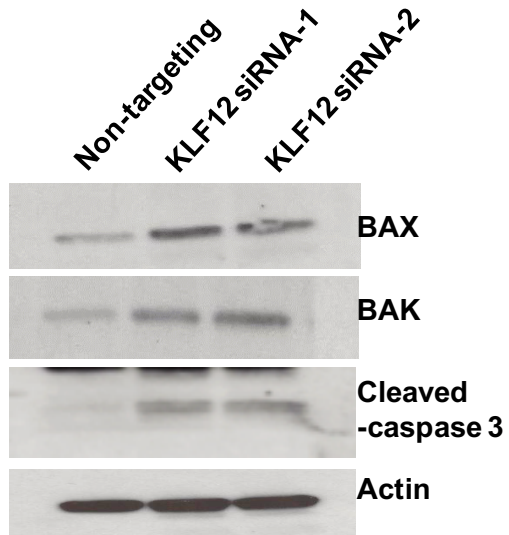

Supplement: pone.0159899.s001.pdf [file pone.0159899.s001.pdf]
